# Supplementary material
Source: publisher site journal article supplement (https://www.dovepress.com/article/521634)
Supplement: Supplementary file 1 [file 521634%20Revised%20Supplementary%20material.pdf]

**Supplementary Table S1**

| Gene target                      | Forward sequence (5' to 3') | Reverse sequence (5' to 3') |
|----------------------------------|-----------------------------|-----------------------------|
| <i>chr16:85667520-85667738-</i>  | ACCAGGGCGCCATTGAG           | ATGAGCCCAAGTCCCCTTC         |
| <i>chr11:33307959-33309057+</i>  | CGGCCAGTCATGTATCAAAGA       | GGCACTTGACTGAGTTTGATAAA     |
| <i>chr12:69044180-69048032+</i>  | TTCCATCACAGCACAGTCCA        | TGTGCATCTACTTCAACTTGCT      |
| <i>chr19:41847788-41848152-</i>  | GAGAGGGCCCAGCATCTG          | ACTTGCAGTGTGTTATCCCTG       |
| <i>chr17:26490569-26499644+</i>  | CTGGAAGCAATGAGGACAGC        | CAGTTGCTGTTTACAAGGAGA       |
| <i>chr12:46622936-46648719-</i>  | TGGCAAACACTGGAATCCTAC       | GGGGAAATCAGGTAGAGAGAAAC     |
| <i>chr18:44526020-44526886+</i>  | GCAAGAGAGACAGAAGGGAAAG      | GTGCTAGGACCCTGTTCTCA        |
| <i>chr7:152007051-152012423-</i> | TGCCAGATGGAAGAACCATT        | CAGTAACAAAAAGCGCAGAGC       |
| <i>chr16:23999829-24046868+</i>  | TCTACATCCAGGCCACATC         | AGGGCAGGAGAATGTGACAA        |
| <i>chr16:68224671-68225678+</i>  | AACCAGAAGATCGAGAGCCT        | GGCAAAGATGGAAGTGAAGACA      |
| <i>GAPDH</i>                     | GGCCTCCAAGGAGTAAGACC        | AGGGGAGATTCAGTGTGGTG        |
| <i>hsa-miR-335-3p</i>            | GGGTTTTTCATTATTGCTC         | -                           |
| <i>hsa-miR-370-3p</i>            | GGGGCCTGCTGGGGTGGAA         | -                           |
| <i>hsa-miR-1255b-5p</i>          | GGGCGGATGAGCAAAGAAA         | -                           |
| <i>U6</i>                        | CTCGCTTCGGCAGCACA           | AACGCTTCACGAATTTGCGT        |

**Supplementary Table S2**

| Gene                                                              | Sequence 5'-3'                                                                                                                                                                                                                                                                                                                                                                                                                                                                |
|-------------------------------------------------------------------|-------------------------------------------------------------------------------------------------------------------------------------------------------------------------------------------------------------------------------------------------------------------------------------------------------------------------------------------------------------------------------------------------------------------------------------------------------------------------------|
| <i>chr11:33307959-33309057+</i><br><i>hsa-circ-0000284</i><br>WT  | GTATGGCCTCACAAGTCTTGGTCTACCCACCATATG<br>TTTATCAAACCTCAGTCAAGTGCCTTTTGTAGTGTGA<br>AGAAACTCAAAGTAGAGCCAAGCAGTTGTGTATTCC<br>AGGAAAGAAACTATCCACGGACCTATGTGAATGGT<br>AGAAACTTTGGAAATTCTCATCCTCCCACTAAGGGT<br>AGTGCTTTTCAGACAAAGATAACATTTAATAGACCT<br>CGAGGACACAACCTTTTCATTGCAGACAAGTGCTGTT<br>GTTTTGAAAAACACTGCAGGTGCTACAAAGGTCATA<br>GCAGCTCAGGCACAGCAAGCTCACGTGCAGGCACC<br>TCAGATTGGGGCGTGGCGAAACAGATTGCATTTCT<br>AGAAGGCCCCAGCGATGTGGATTGAAGCGCAAGA<br>GTGAGGAGTTGGATAATCATAGCA |
| <i>chr16:68224671-68225678+</i><br><i>hsa-circ-0000713</i><br>WT  | CCTGTGGGGTCTTCCTATCAGCCTATGCAAACCTAAT<br>GTTGTGTACAATGGACCAACTTGTCTTCCTATTAAT<br>GCTGCCTCTAGTCAAGAATTTGATTCAGTTTTGTTTC<br>AGCAGGATGCAACTCTTTCTGGTTTAGTGAATCTTG<br>GCTGTCAACCACTGTCATCCATAACATTTTCATTCTTC<br>AAATTCAGGCTCAACAGGACATCTCTTAGCCCATAC<br>ACCTCATTCTGTGCATACCCTGCCTCATCTGCAATCA<br>ATGGGATATCATTGTTCAAATACAGGACAAAGATCT<br>CTTT                                                                                                                                     |
| <i>chr16:68224671-68225678+</i><br><i>hsa-circ-0000713</i><br>Mut | CCTGTGGGGTCTTCCTATCAGCCTATGCAAACCTAAT<br>GTTGTGTACAATGGACCAACTTGTCTTCCTATTAAT<br>GCTGCCTCTAGTCAAGAATTTGATTCAGTTTTGTTTG<br>TCGTCCTTGCAACTCTTTCTGGTTTAGTGAATCTTGG<br>CTGTCAACCACTGTCATCCATAACATTTTCATTCTTCA<br>AATTCAGGCTCAACAGGACATCTCTTAGCCCATACA<br>CCTCATTCTGTGCATACCCTGCCTCATCTGCAATCAA<br>TGGGATATCATTGTTCAAATACAGGACAAAGATCTC<br>TTT                                                                                                                                     |
| <i>hsa-miR-1255b-5p</i><br><i>hsa-miR-370-3p</i>                  | CGGAUGAGCAAAGAAAGUGGUU<br>GCCUGCUGGGGUGGAACCUUGU                                                                                                                                                                                                                                                                                                                                                                                                                              |

*ANK3*  
WT

CAGCGAACGGTCAGTCAAGGATCATAAGTTTTTACT  
GCCAGTATTGAGAAATTCGTGGAAGAAATGTCAGC  
AGGAAGTAAAAATTCACCGAGAAGTGTGTGTGTGTT  
CGCTGCTTCCACACATTAATGGCATGATTTTTTTTAT  
GCAAAAAGAAAAGAAAAGAAAACCACCCACATTTT  
AATTTAGCATGAGCCAATTTACAGAGCATGGAAATC  
ACTTTCATTTCCGGATTGGCGCGTGTGCAATTAGCA  
ATGCAGTGTATATACAAGAAGCCATGCTGTTAACAG  
TTTATCTCAAGTA

*ANK3*  
Mut

CAGCGAACGGTCAGTCAAGGATCATAAGTTTTTACT  
GCCAGTATTGAGAAATTCGTGGAAGAAATGTGTGCGT  
CCTAGTAAAAATTCACCGAGAAGTGTGTGTGTGTTT  
GCTGCTTCCACACATTAATGGCATGATTTTTTTTATG  
CAAAAAGAAAAGAAAAGAAAACCACCCACATTTTA  
ATTTAGCATGAGCCAATTTACAGAGCATGGAAATCA  
CTTTCATTTCCGGATTGGCGCGTGTGCAATTAGCAA  
TGCAGTGTATATACAAGAAGCCATGCTGTTAACAGT  
TTATCTCAAGTA

*MGLL*  
WT

CCTGGGCCTGGGCCTGCCTATGGCCCAGAGCTACCC  
TGGGAGTGTCAGTGCTAGCAGCACAGCTACCTCTGG  
TGGCAGGAGAAGAGAGGCCACAGCAGCAGCAGGC  
CAGGCCTTCCTGTCCAGGTCTGCATGGAGCACTCGG  
TGACCCAGAGCAGGGACTGGAGGCACCCCCAGCCC  
TGCCCCAGGCCACAGCAGGACAGGCCGGGACAGGC  
CTCACCCAAGGCCAAGGCTGGCATCAGCCAATCATT  
CAGAGCTGAGGCCCTGGGCCTAGCCTGCCCTTCTCA  
GGTGCCAATACCACC

*MGLL*  
Mut

CCTGGGCCTGGGCCTGCCTATGGCCCAGAGCTACCC  
TGGGAGTGTCAGTGCTAGCAGCACAGCTACCTCTGG  
TGGCAGGAGAAGAGAGGCCACAGGTTCGTCCC  
CAGGCCTTCCTGTCCAGGTCTGCATGGAGCACTCGG  
TGACCCAGAGCAGGGACTGGAGGCACCCCCAGCCC  
TGCCCCAGGCCAGTCGTCCTCAGGCCGGGACAGGCC  
TCACCCAAGGCCAAGGCTGGCATCAGCCAATCATT  
AGAGCTGAGGCCCTGGGCCTAGCCTGCCCTTCTCAG  
GTGCCAATAACCACC

*DGKZ*  
WT

CGGGCCGCCACGGGCAGCAGGAGGGACAATGCGG  
CCAGGGGACGAGCGCCTTCCTTGCCCACCTCACTGC  
CACATTCCAGTGGGACGGCCACGGGGGACCTAGG  
CCCCAGGGAAAGAGCCCCATGCCGCCCCCTAAGGA  
GCCGCCAGACCTAGGGCTGGACTCAGGAGCTGGG  
GGGGCCTCACCTGTTCCCCTGAGGACCCCGCCG

---

### Supplementary Table S3

| Gene target                   | Forward sequence (5' to 3') | Reverse sequence (5' to 3') |
|-------------------------------|-----------------------------|-----------------------------|
| si-1- <i>hsa-circ-0000713</i> | CACUUAGAUGAUGUUUUGAUTT      | AUCAAACAUCUAUCUAAAGUGTT     |
| si-2- <i>hsa-circ-0000713</i> | UAGAUGAUGUUUUGAUGAAGCTT     | GCUUCAUCAAACAUCUAUCUATT     |

**Supplementary Table S4**

| Gene target             | Sense sequence (5' to 3') | Antisense sequence (5' to 3') |
|-------------------------|---------------------------|-------------------------------|
| <i>hsa-circ-0000713</i> | ACCAGAAGATCGAGAGCCTAACT   | AGGCAAAGATGGAAGTGAAGAC        |
| <i>hsa-miR-370-3p</i>   | TGCGCGCCTGCTGGGGTGGAAAC   | CCAGTGCAGGGTCCGAGGTATT        |
| <i>ANK3</i>             | CACACCACCTACCCCTTTCC      | GTCCATCTGCGGAATGCTCT          |
| <i>MGLL</i>             | AGGGGAGAGGATGGTAGTGT      | GCAAGAACCAGAGGGCGAAAT         |
| <i>U6</i>               | CGCTTCGGCAGCACATATAC      | AAATATGGAACGCTTCACGA          |
| <i>GAPDH</i>            | TCAAGAAGGTGGTGAAGCAGG     | TCAAAGGTGGAGGAGTGGGT          |

**Supplementary Table S5**

| General data         | Early-onset schizophrenia<br>(EOS, n = 32) | Healthy controls<br>(HCs, n = 29) | <i>P</i>            |
|----------------------|--------------------------------------------|-----------------------------------|---------------------|
| age (years)          | 15.31±0.4761                               | 15.31±0.1323                      | 0.5239 <sup>a</sup> |
| Gender (Male/female) | 14/18                                      | 13/16                             | 0.9326 <sup>b</sup> |
| Education (years)    | 9.281±0.4473                               | 10.41±0.1055                      | 0.2100 <sup>a</sup> |

Note: a: Mann-Whitney U test; b:  $\chi^2$  test; Mean  $\pm$  SEM(mean  $\pm$  standard error of mean)
